# Supplementary material
Source: PubMed Central journal article supplement (PMC3121452)

# Figure S1

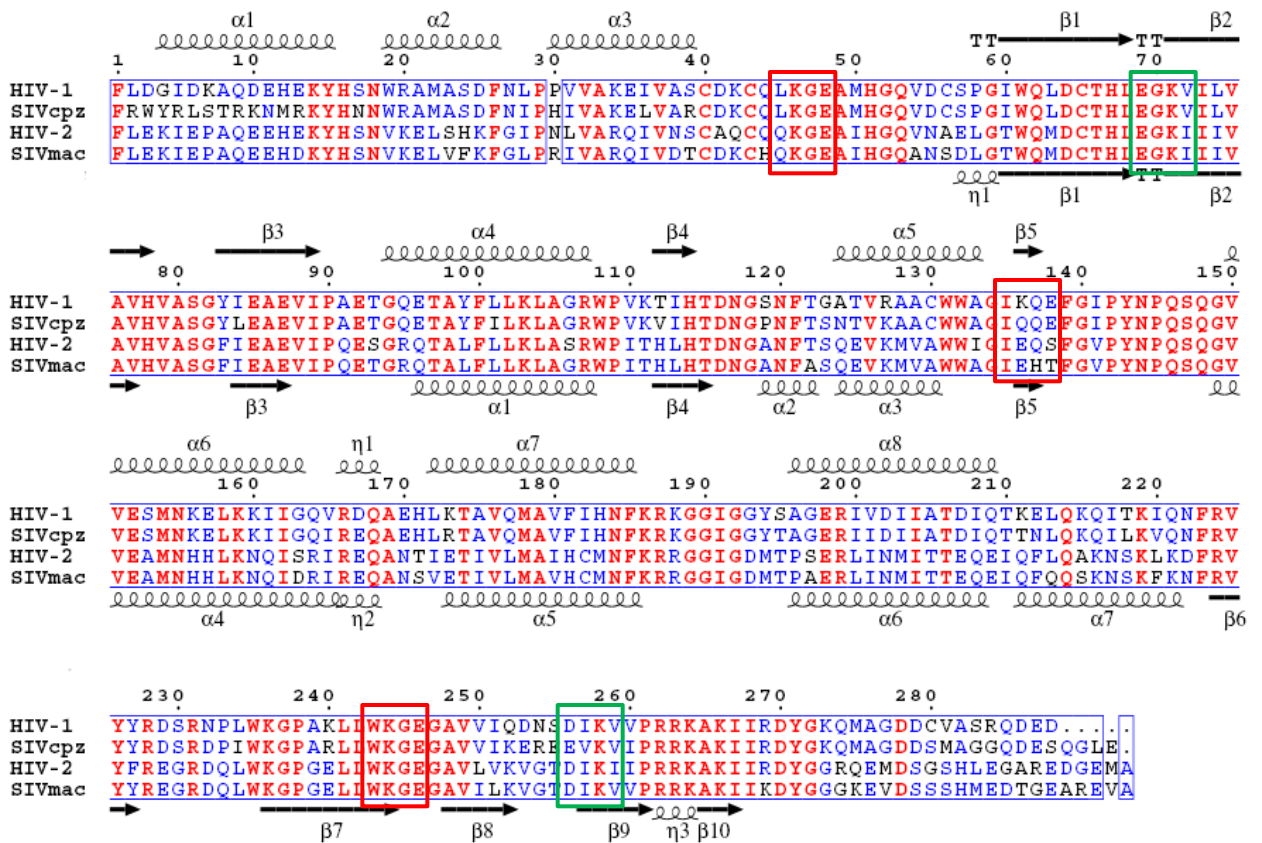

Supplement: supp_M110.189274_jbc.M110.189274-1.pdf [file supp_M110.189274_jbc.M110.189274-1.pdf]

Figure S3

A

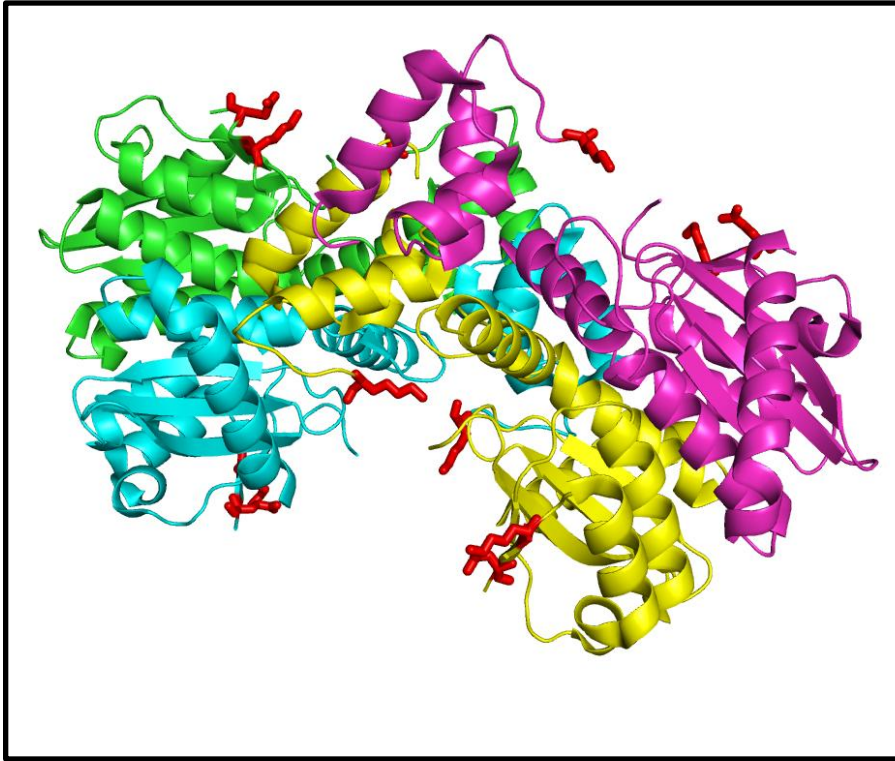

B

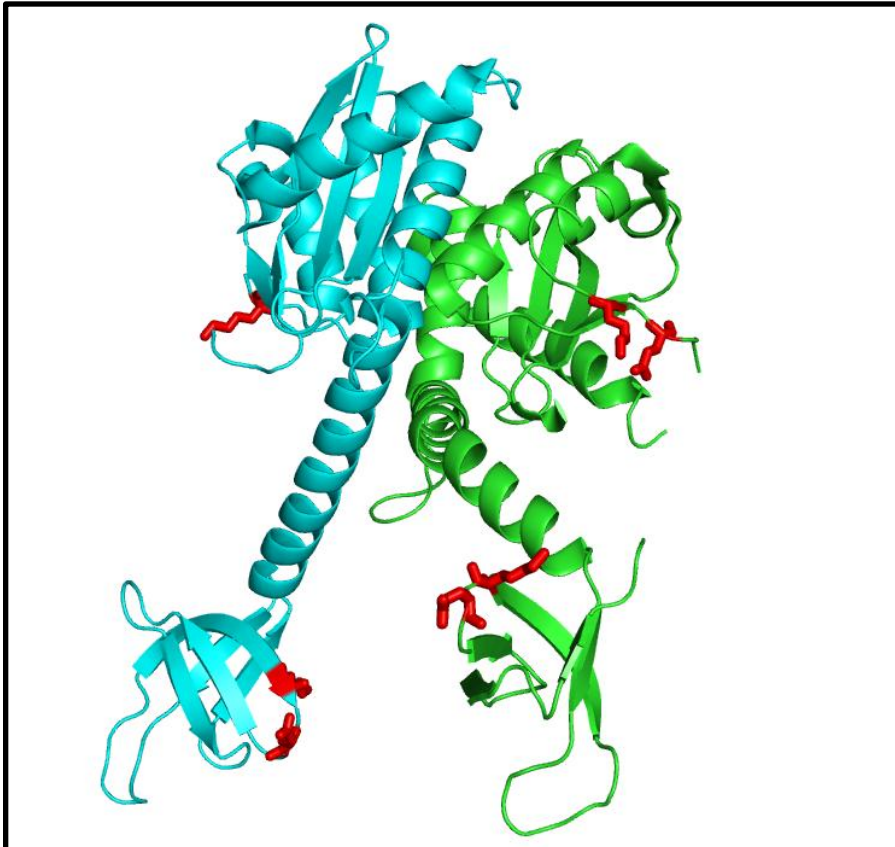

Supplement: supp_M110.189274_jbc.M110.189274-3.pdf [file supp_M110.189274_jbc.M110.189274-3.pdf]

Figure S4

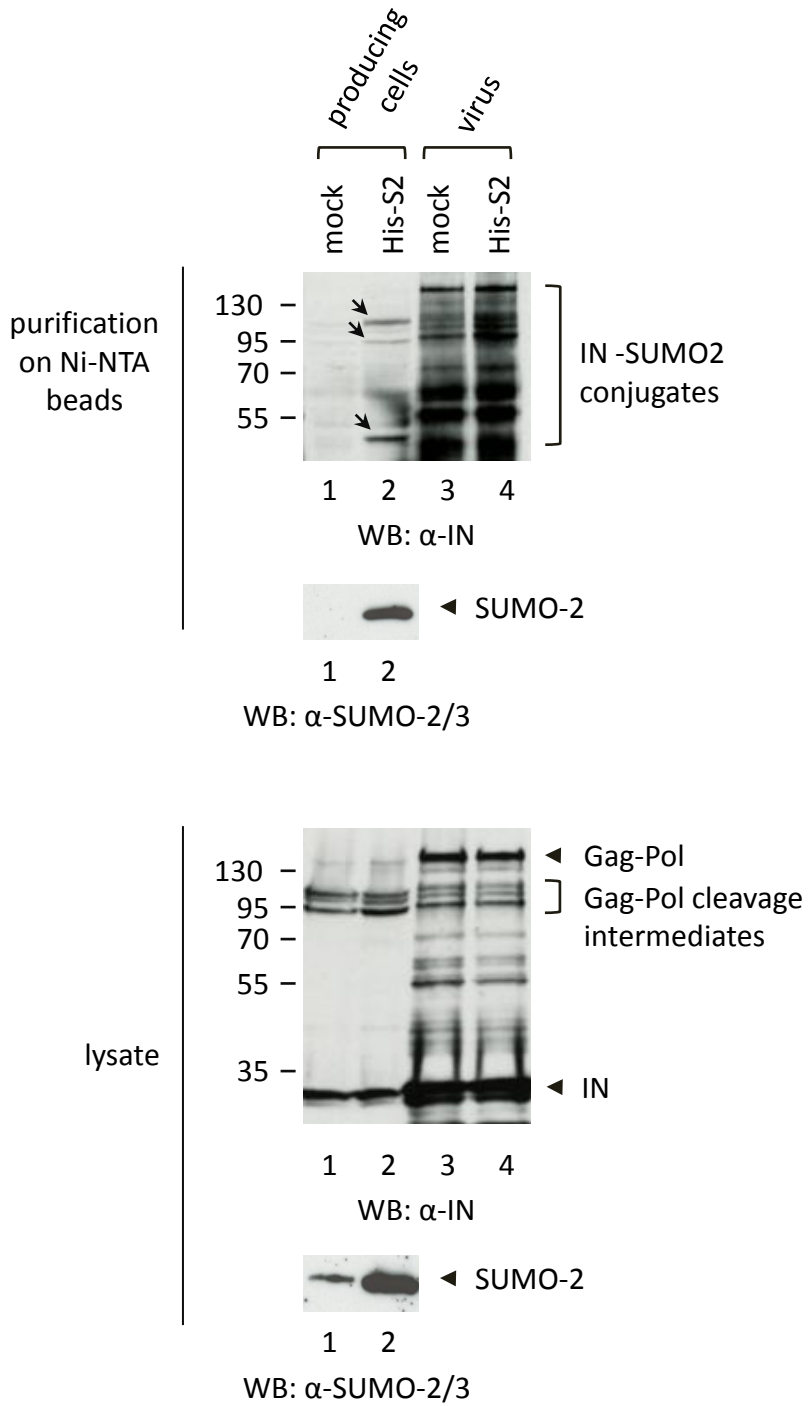

Supplement: supp_M110.189274_jbc.M110.189274-4.pdf [file supp_M110.189274_jbc.M110.189274-4.pdf]
